# Supplementary material for: Enhancement of photocatalytic performance in two zinc-based metal–organic frameworks by solvent assisted linker exchange
Source: Royal Society of Chemistry journal article supplement (doi:10.1039/c7ce01295k), 2017-01-01
Supplement: c7ce01295k1.pdf [file c7ce01295k1.pdf]

## Supplementary information

# Enhancement of Photocatalytic Performance in Two Zinc-Based Metal-Organic Frameworks by Solvent Assisted Linker Exchange

Mohammad Yaser Masoomi,<sup>‡</sup> Minoos Bagheri<sup>‡</sup> and Ali Morsali\*

Department of Chemistry, Faculty of Sciences, TarbiatModares University, P.O. Box  
14115-175, Tehran, Islamic Republic of Iran

Email: [Morsali\\_a@modares.ac.ir](mailto:Morsali_a@modares.ac.ir), [Morsali\\_a@yahoo.com](mailto:Morsali_a@yahoo.com)

<sup>‡</sup> These authors contributed equally to this work.

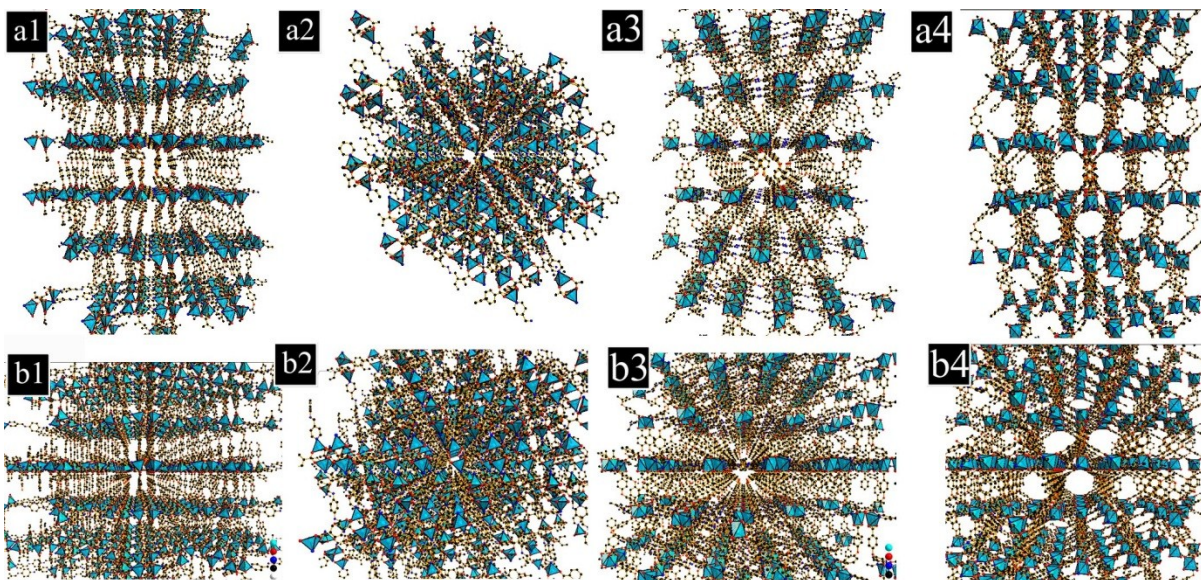

**Fig. S1.** (a1-a4) Ball and stick representation of TMU-4 along the  $a$ -,  $b$ -,  $c$ -axes and  $[1\ 0\ 1]$  direction. (b1-b4) Ball and stick representation of TMU-6 along the  $a$ -,  $b$ -,  $c$ -axes and  $[1\ 0\ 1]$  direction. Color code: O: red; N: blue; C: black; and Zn: blue polyhedra. DMF molecules are omitted for clarity.

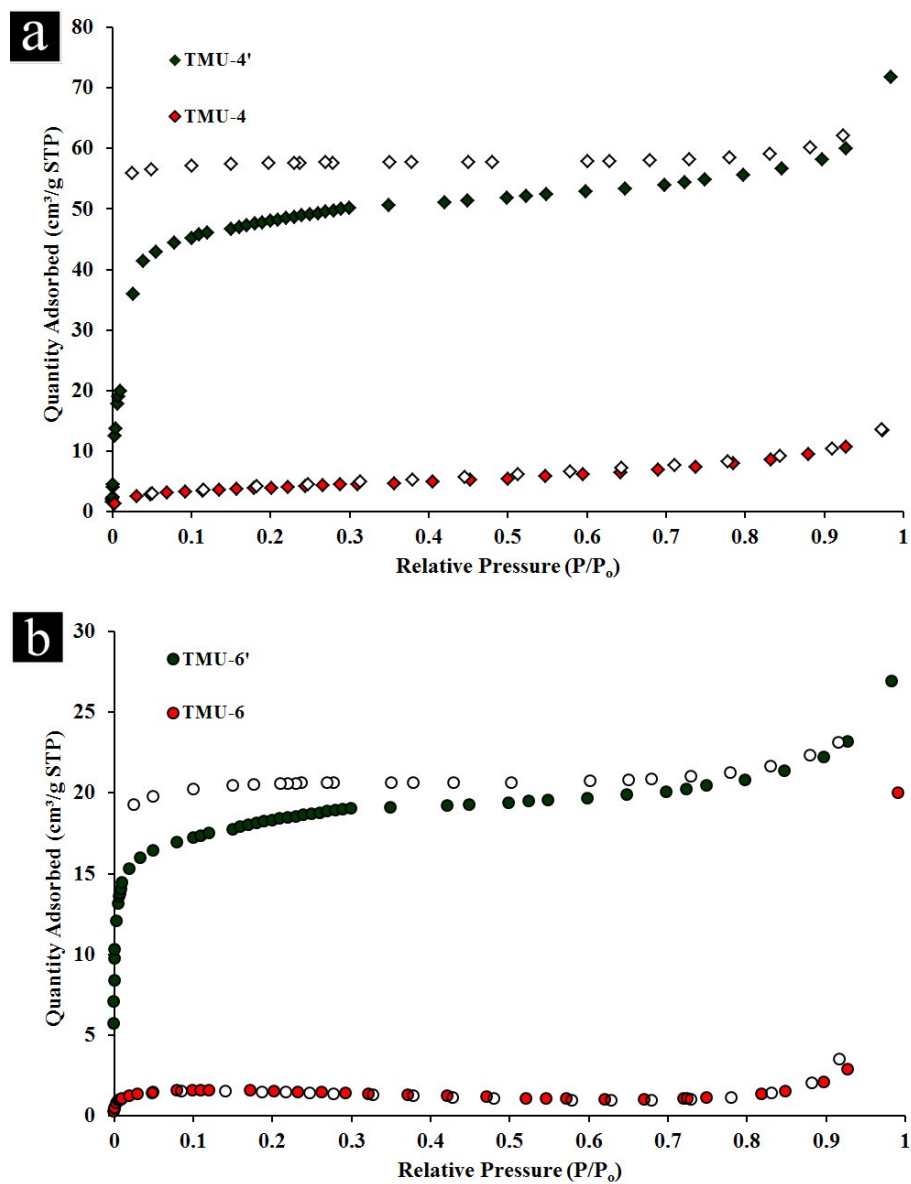

**Fig. S2.** N<sub>2</sub> isotherms collected at 77 K and 1 bar on (a) TMU-4 and TMU-4' and (b) TMU-6 and TMU-6'.

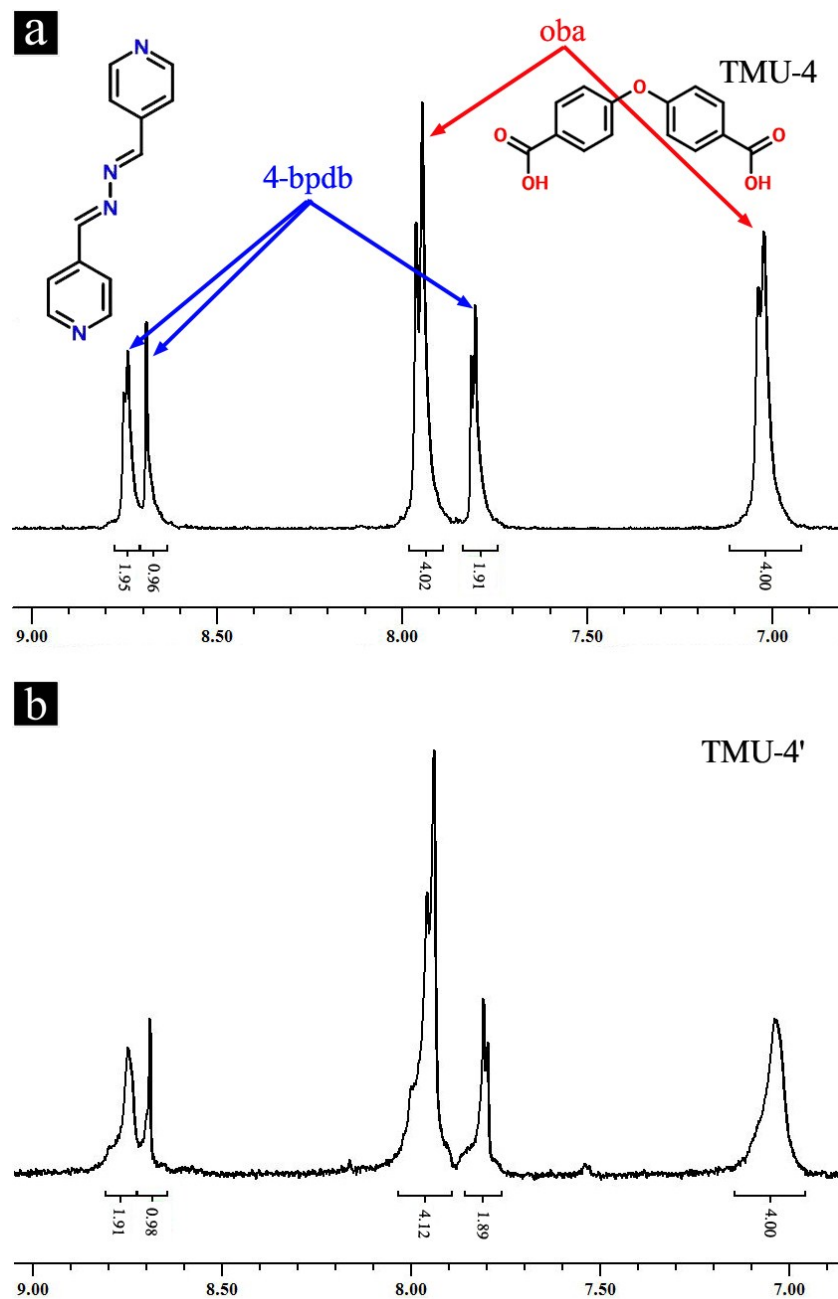

**Fig. S3.** The  $^1\text{H}$  NMR spectra of (a) the digested sample of TMU-4 and (b) the linker-exchange process in TMU-6 with 4-bpdb after 21 days (100% exchange) ( $\text{D}_2\text{SO}_4/\text{d}_6$ -DMSO).

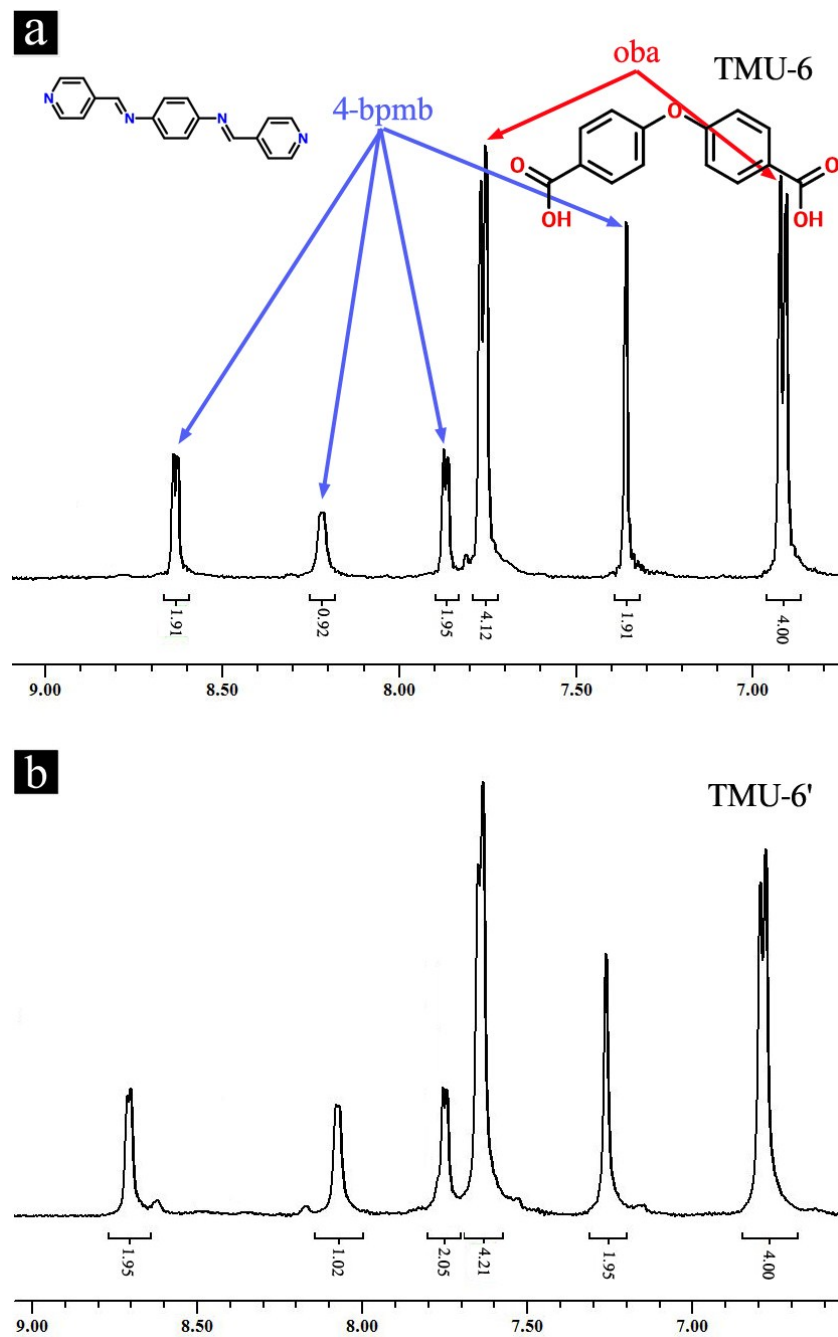

**Fig. S4.** The  $^1\text{H}$  NMR spectra of (a) the digested sample of TMU-6 and (b) the linker-exchange process in TMU-4 with 4-bpmb after 24 h (100% exchange) ( $\text{D}_2\text{SO}_4/\text{d}_6\text{-DMSO}$ ).

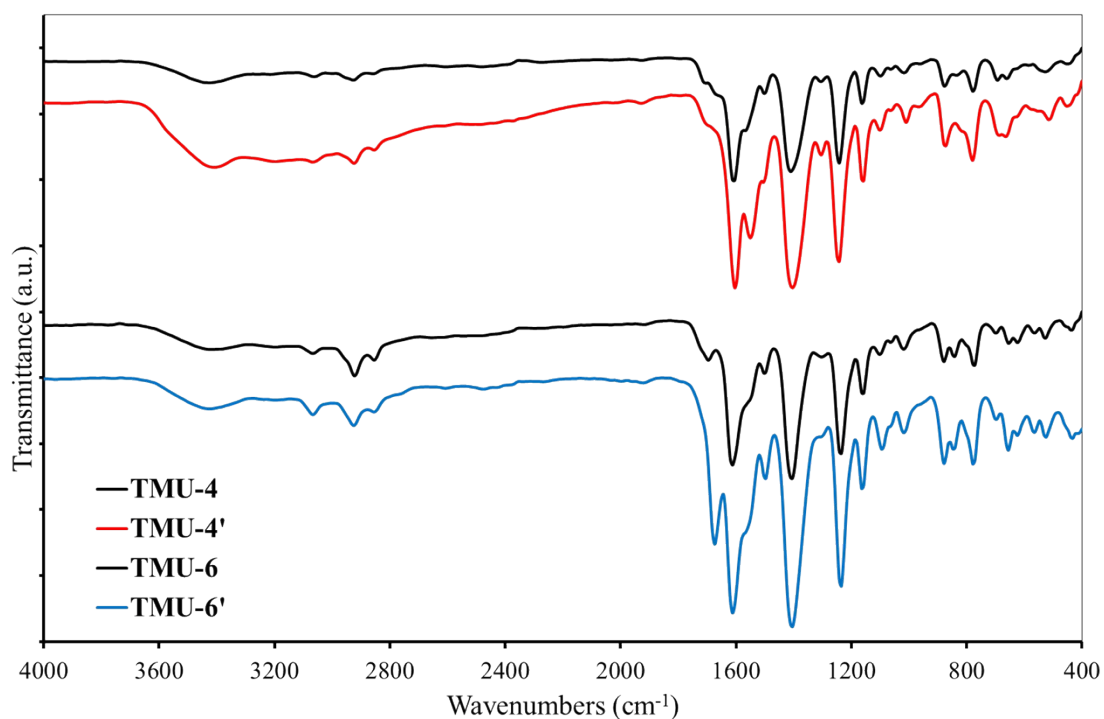

**Fig. S5.** IR spectra of parent TMU-4 and TMU-6 and daughter TMU-4' and TMU-6' after SALE process.

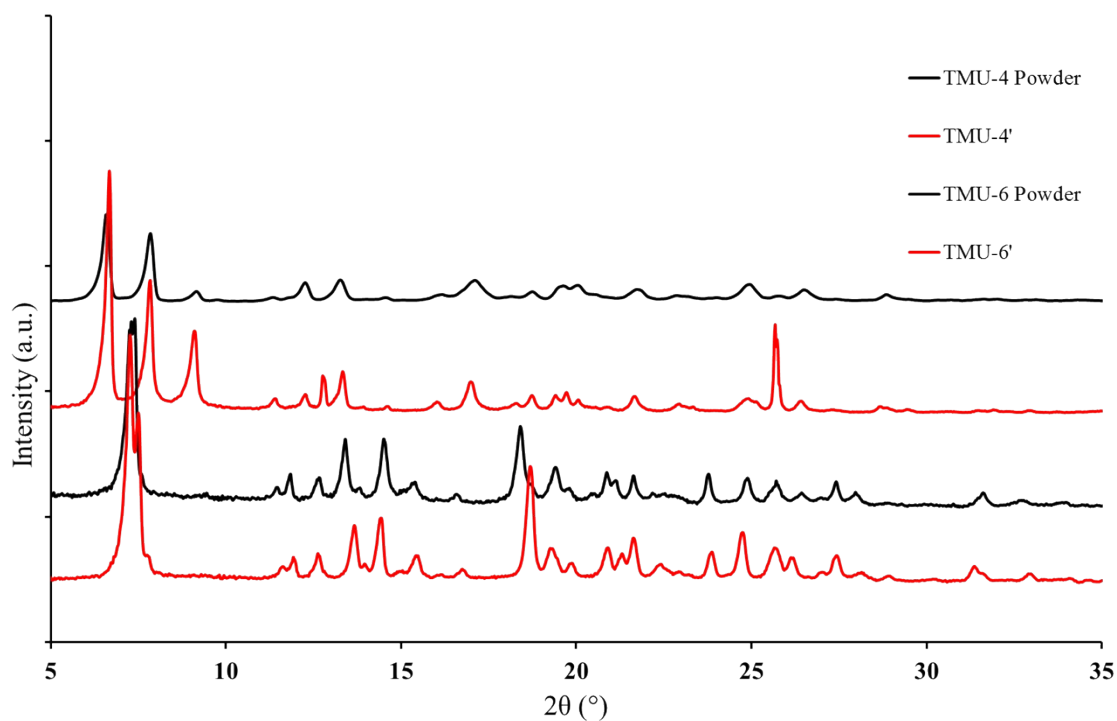

**Fig. S6.** Comparison of XRD patterns for parent TMU-4 and TMU-6 and their daughter synthesized via SALE.

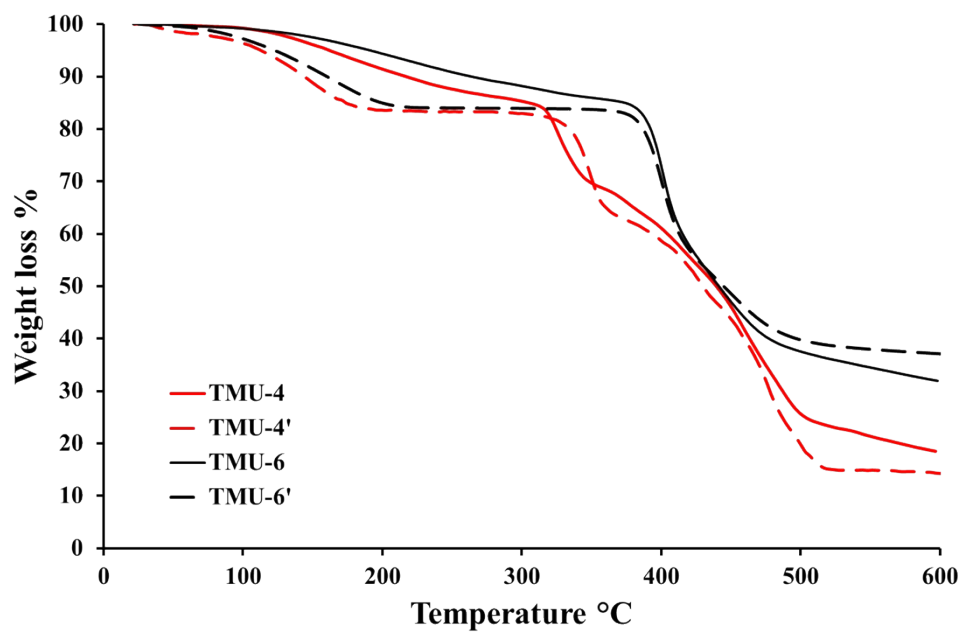

**Fig. S7.** Thermogravimetric profiles of TMU-4, TMU-4', TMU-6 and TMU-6'.

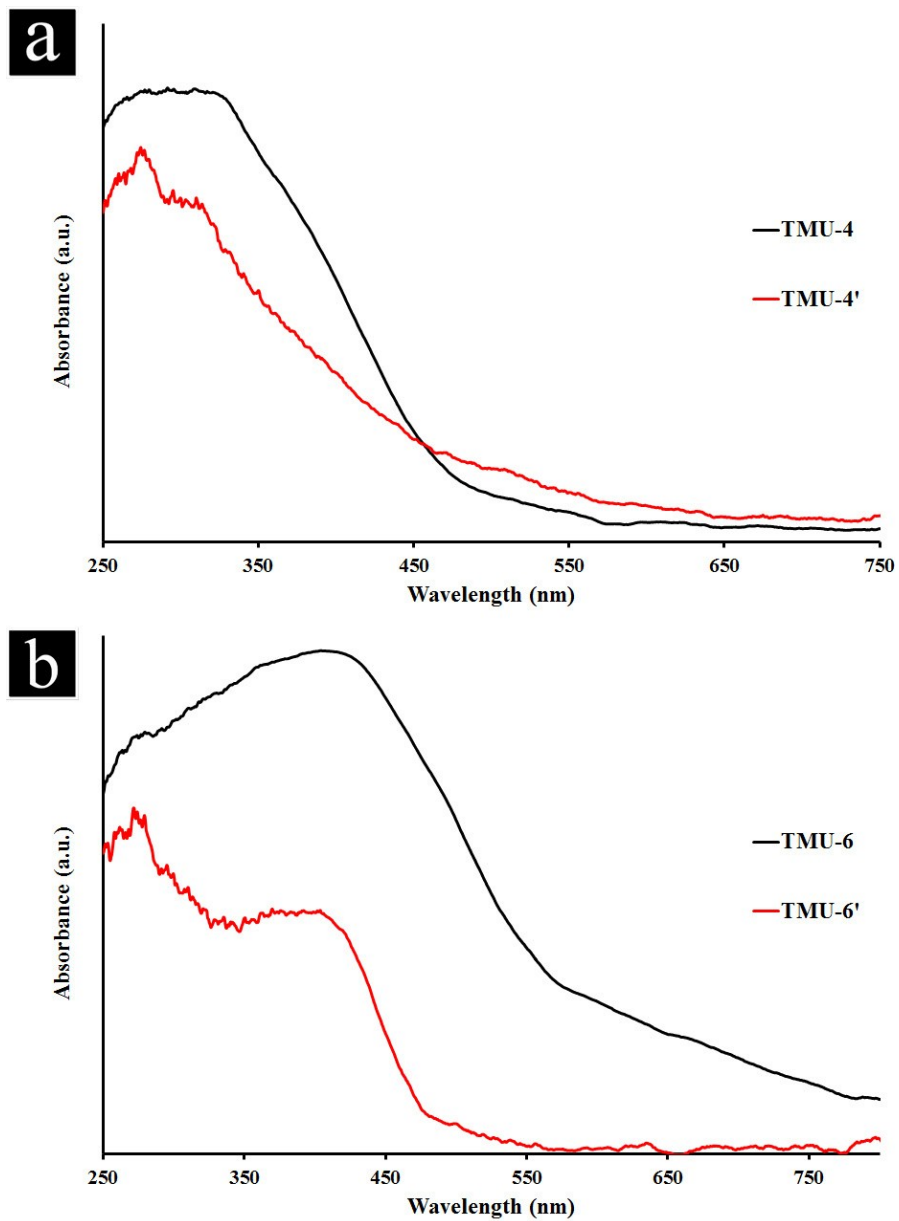

**Fig. S8.** UV-vis diffuse reflectance spectra of the MOFs.



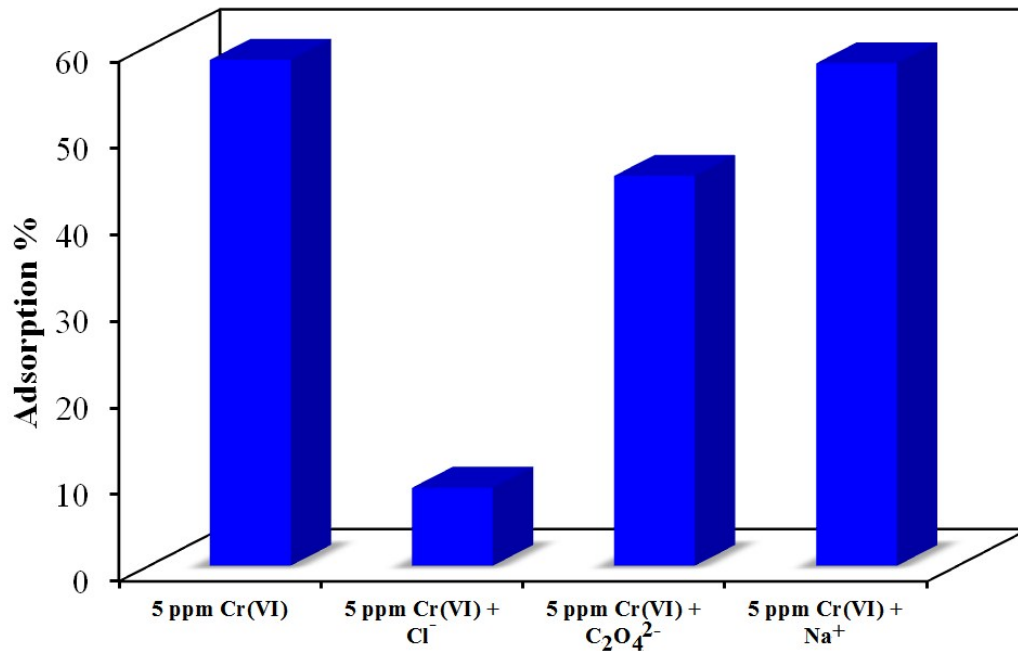

**Fig. S9.** Effect of different ions on adsorption of 5 ppm Cr(VI) in presence of TMU-4' as the best adsorbent.

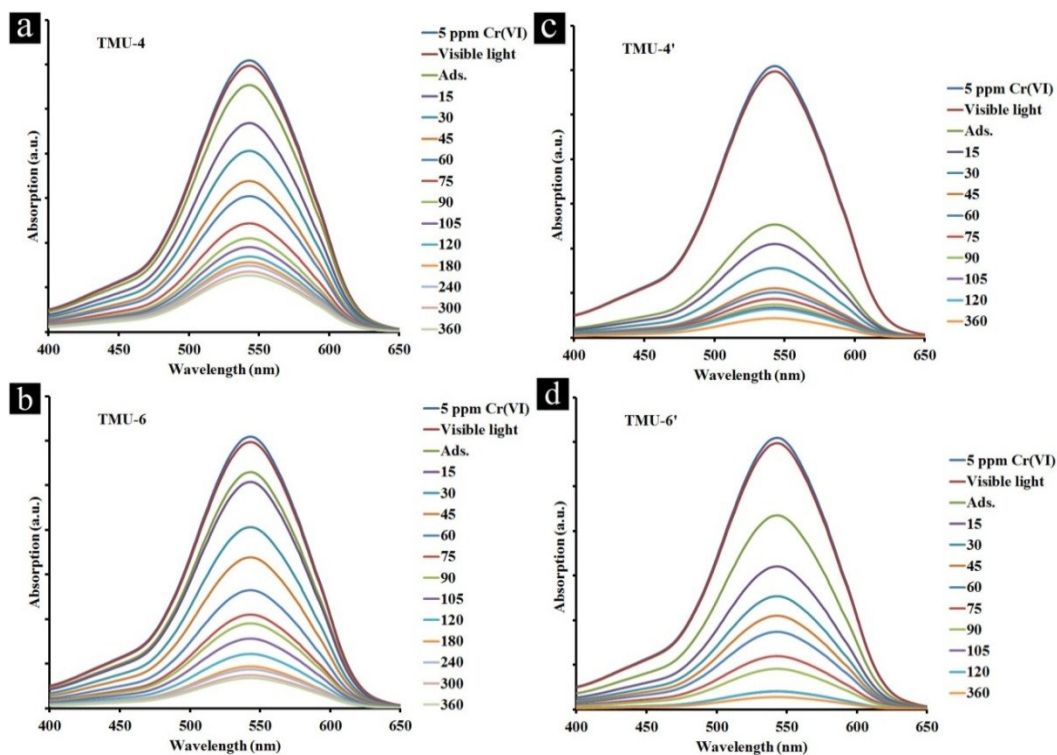

**Fig. S10.** UV-vis spectra of DPC solution in presence of Zn-based MOF photocatalysts under visible light.

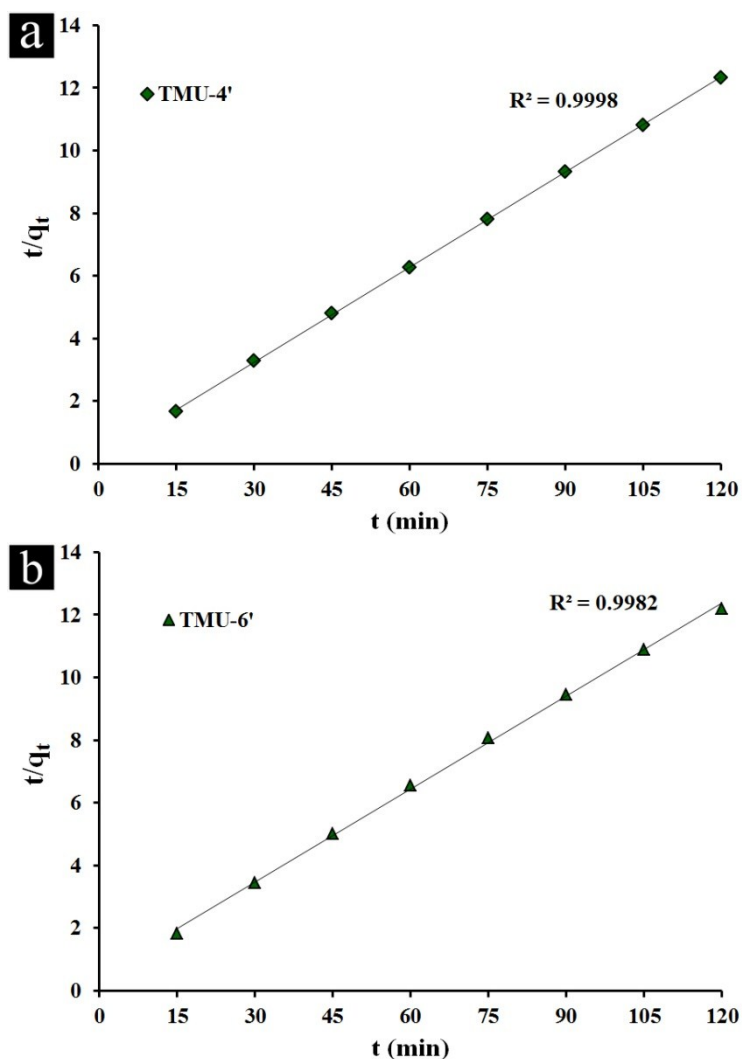

**Fig. S11.** Effect of time on Cr(VI) reduction described by pseudo-second order linear plots over a) TMU-4' and b) TMU-6' MOFs.

**Table S1.** BET surface area and adsorption properties of Zn-based MOFs in presence of various concentrations of Cr(VI) solution for 1 h.

| MOFs   | Adsorption (%) |        |        |        | BET (m <sup>2</sup> /g) |
|--------|----------------|--------|--------|--------|-------------------------|
|        | 5 ppm          | 10 ppm | 15 ppm | 20 ppm |                         |
| TMU-4  | 9.2            | 5.4    | 2.5    | 1.8    | 1                       |
| TMU-6  | 9.1            | 4.9    | 2      | 1.2    | 6                       |
| TMU-4' | 58.4           | 45.6   | 32.7   | 23.8   | 207                     |
| TMU-6' | 30.3           | 25.7   | 19.5   | 12.3   | 68                      |
